# Supplementary material for: A comprehensive analysis of the prognostic and immunotherapeutic characteristics of KIFC1 in pan-cancer and its role in the malignant phenotype of pancreatic cancer
Source: publisher site journal article supplement (doi:10.18632/aging.205311), 2023-12-18
Supplement: Supplementary file [file aging-v15i24-205311-supplementary-material-SD1.pdf]

SUPPLEMENTARY FIGURE

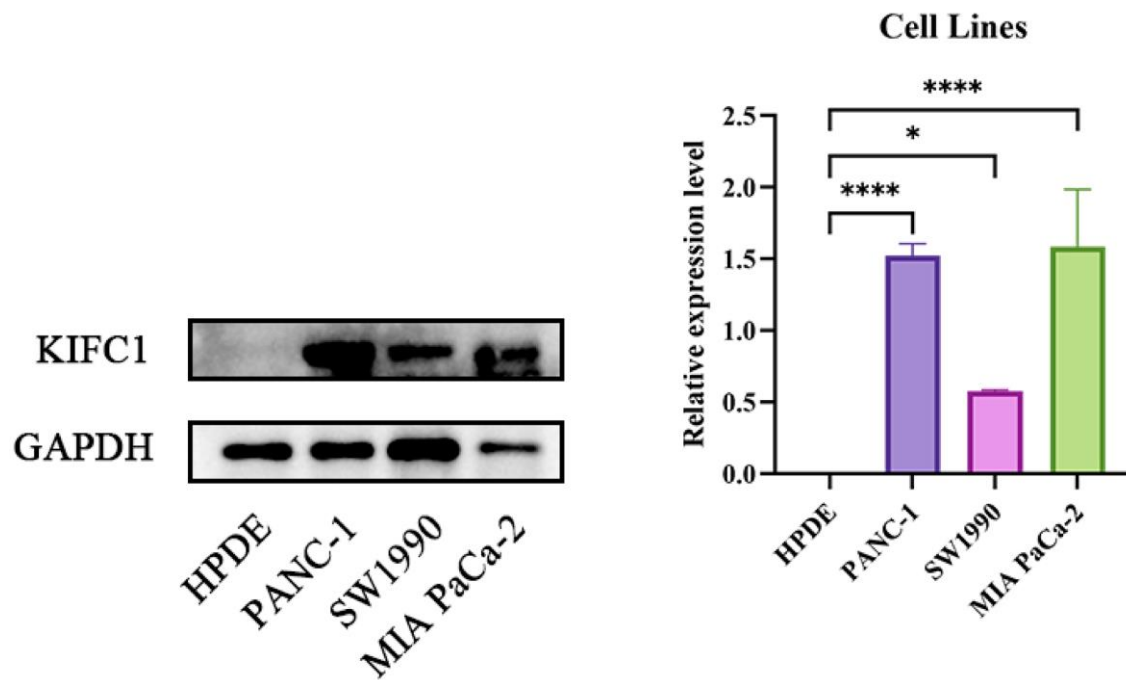

Supplementary Figure 1. The differential expression of KIFC1 in pancreatic cancer cell lines.
